# Supplementary material
Source: PubMed Central journal article supplement (PMC11670652)

Fig 3A

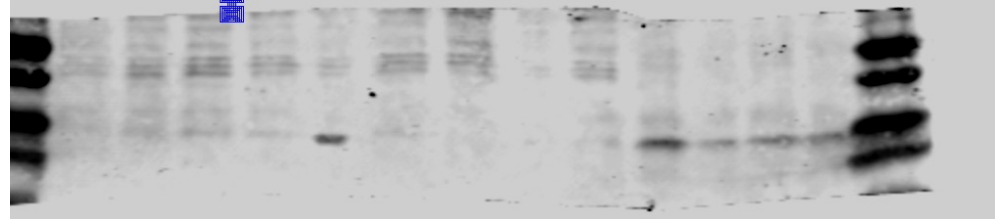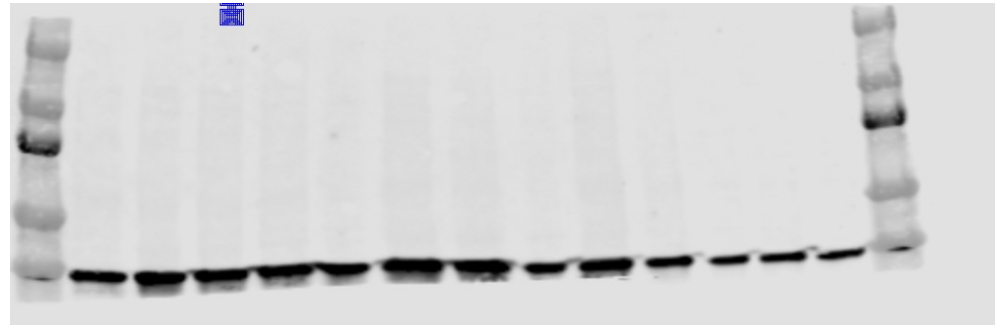

Fig 3B

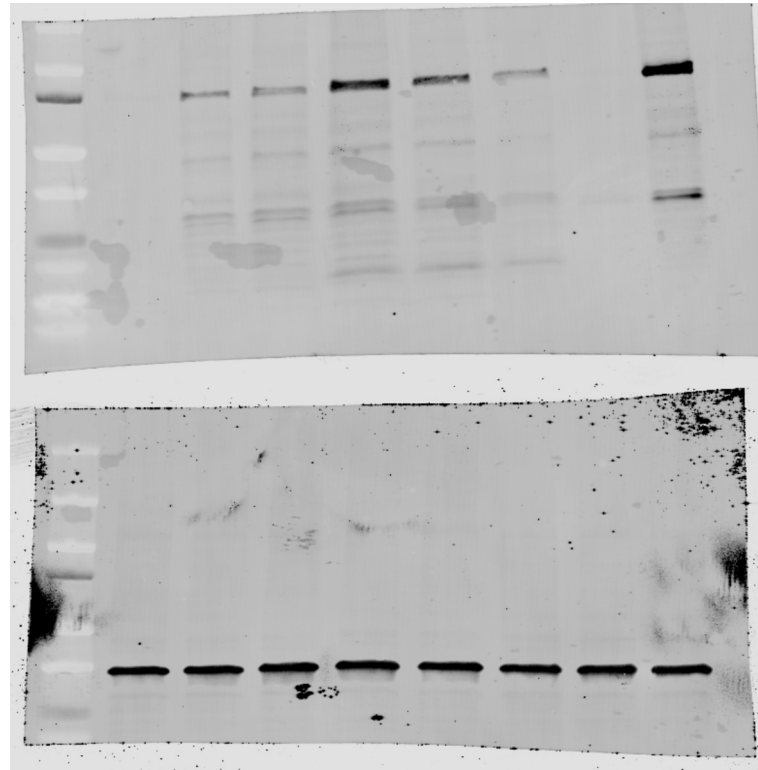

Top upside down

Fig 3D

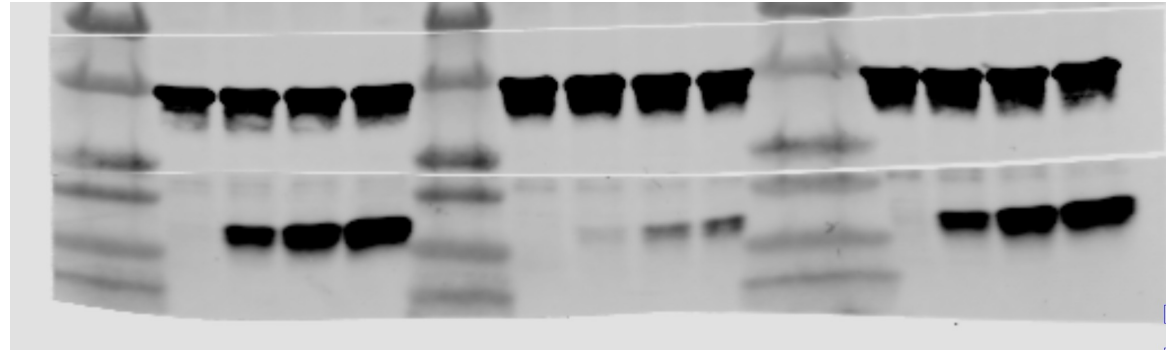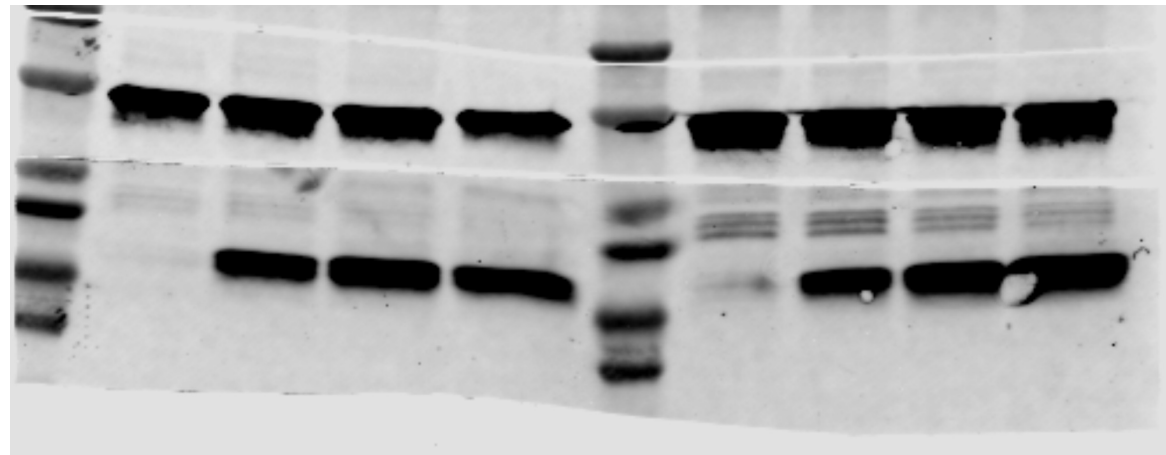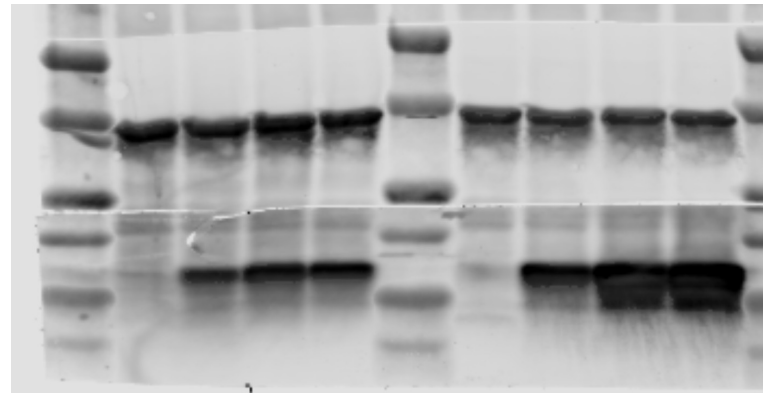

Fig 6D

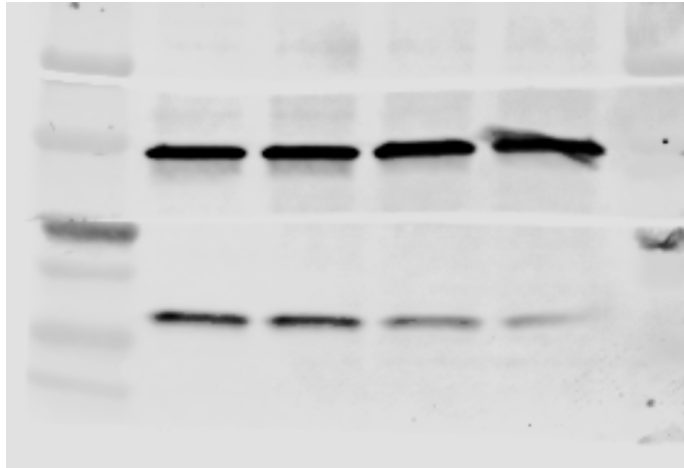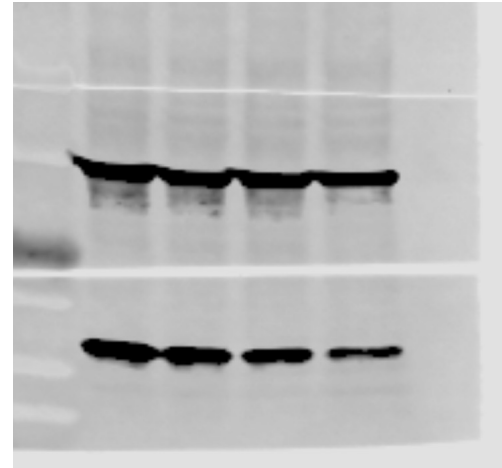

Fig 6E

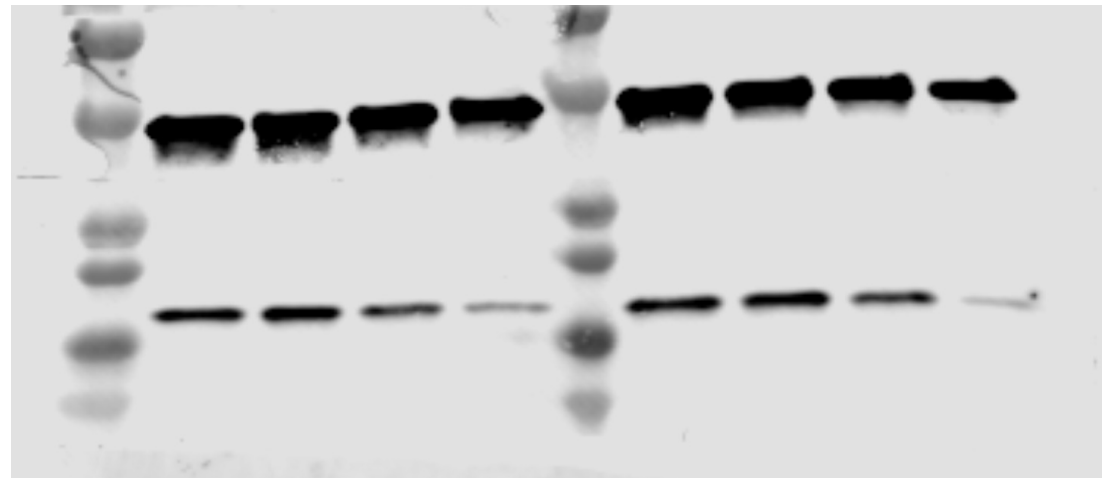

Fig 6F

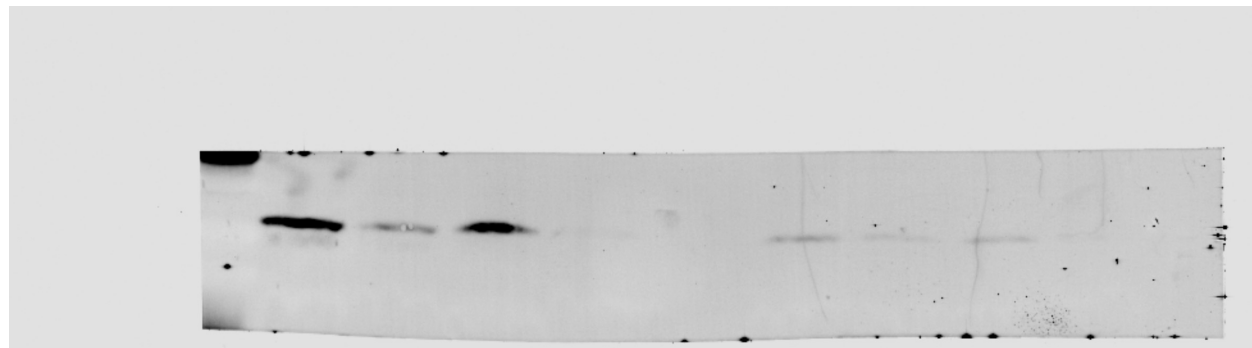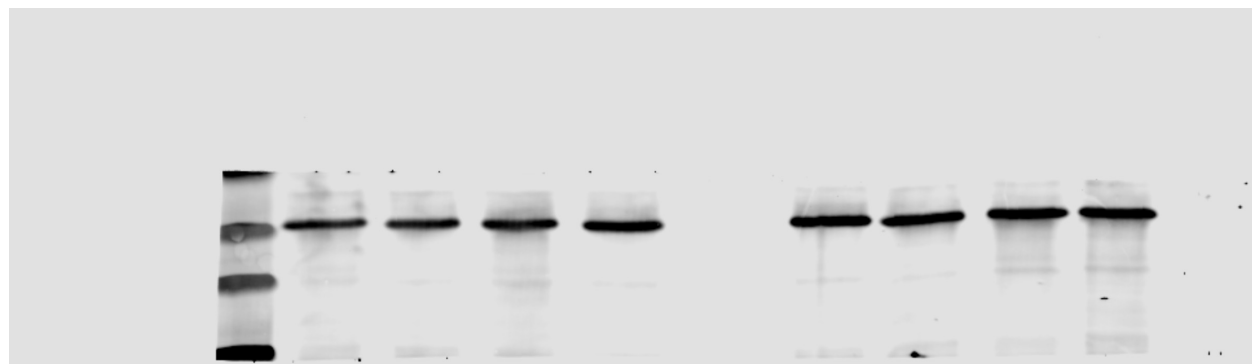

Fig 6J

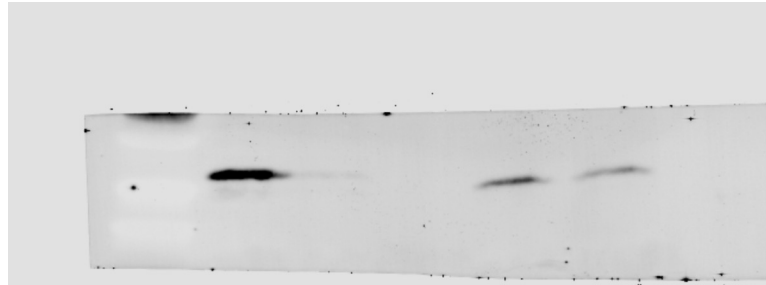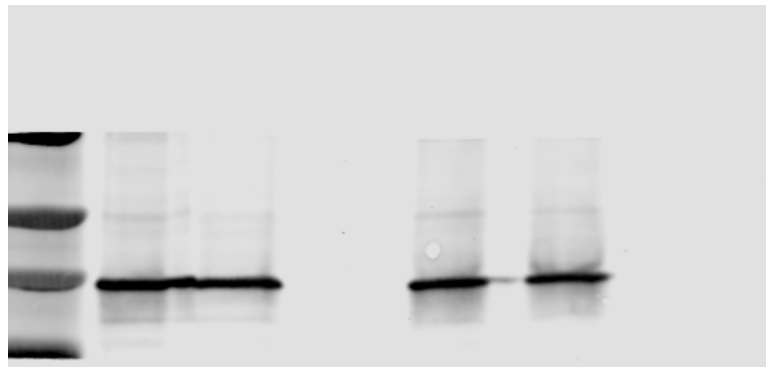

Fig 7D

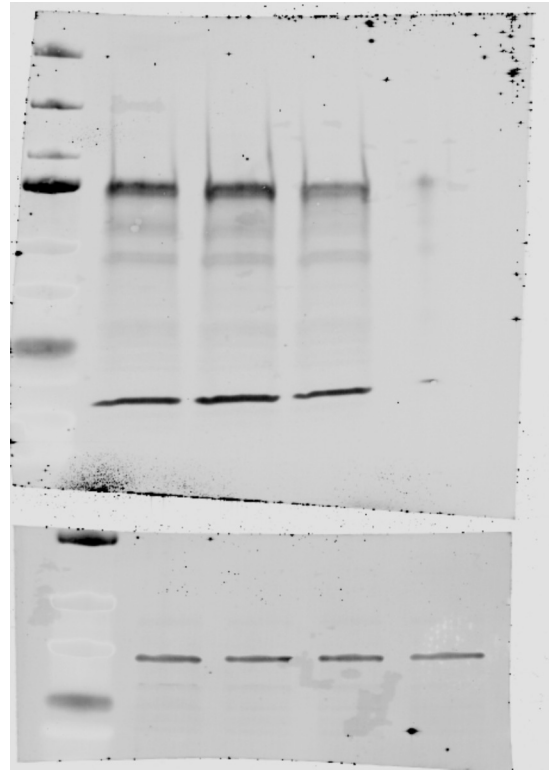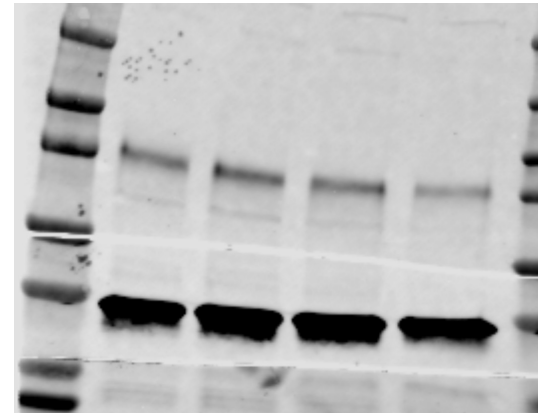



Fig 7E

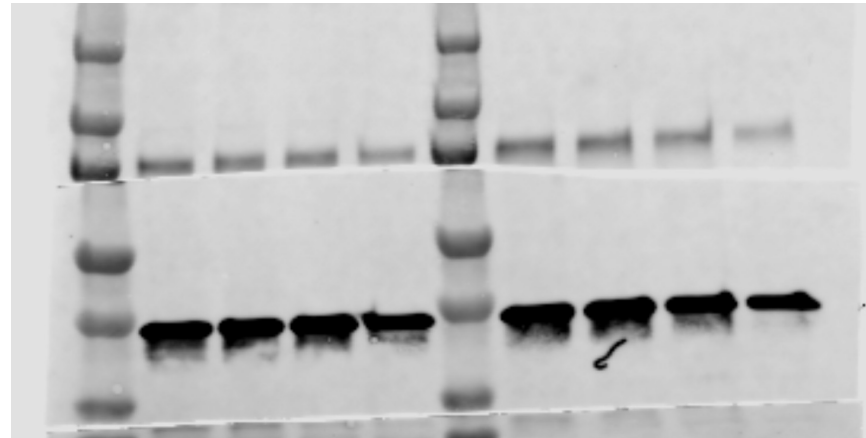

Fig 7F

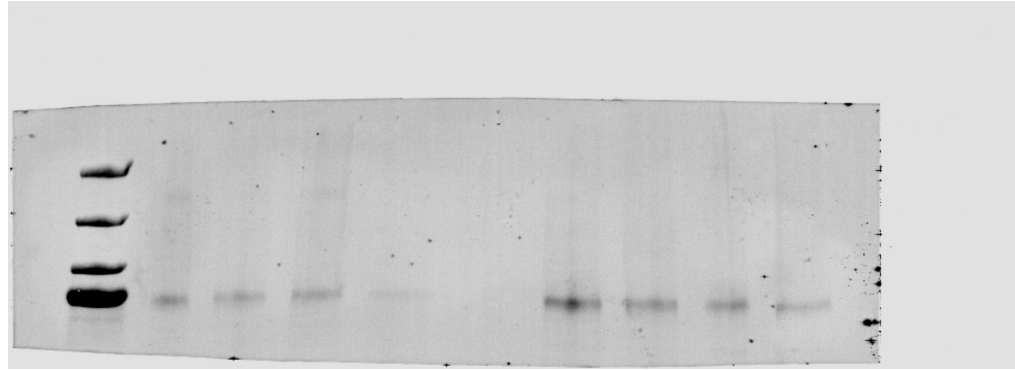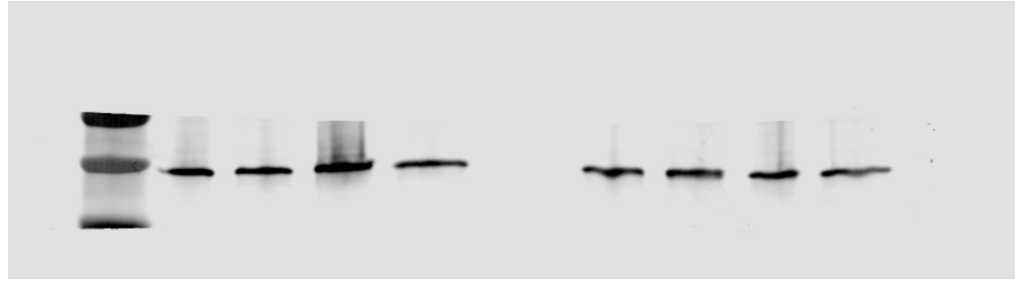

Fig 7G

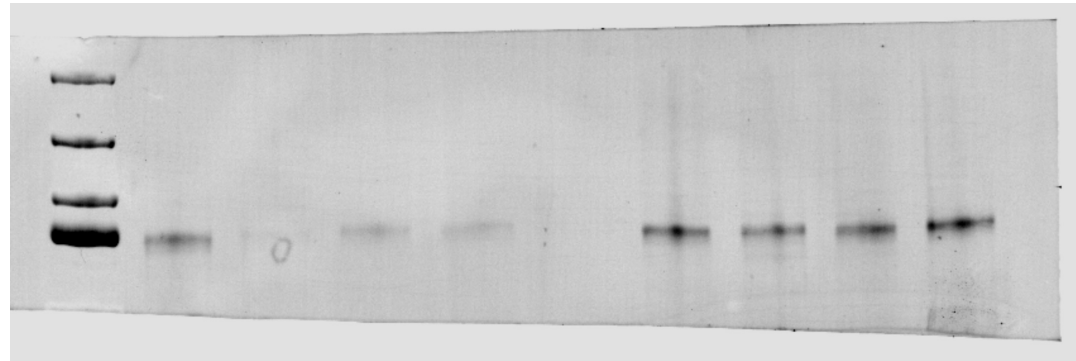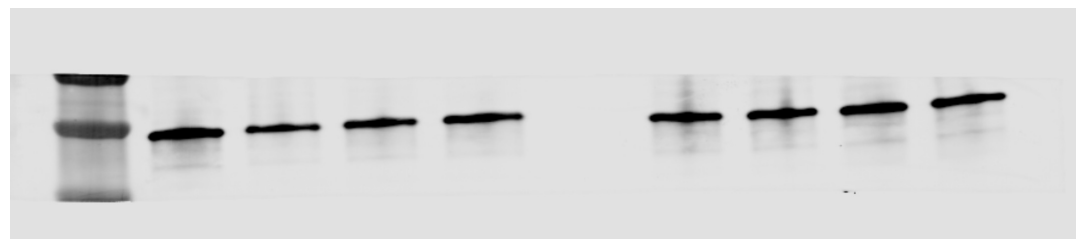

Fig 7I

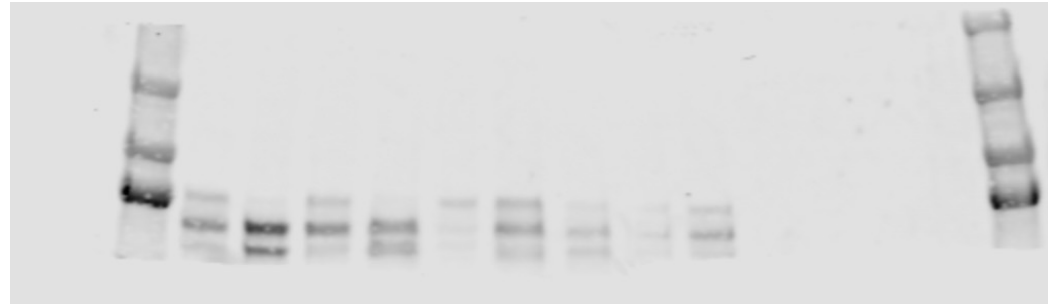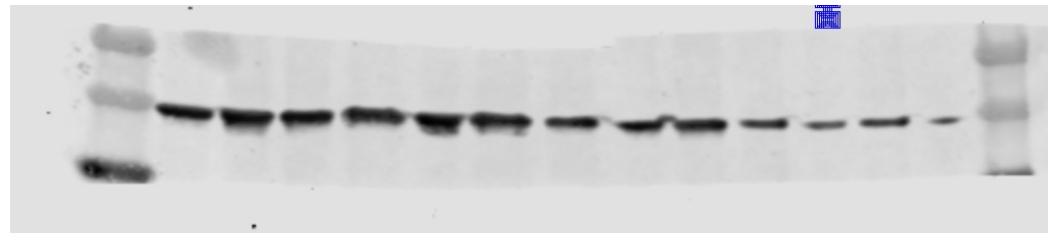

Supp Fig 2B

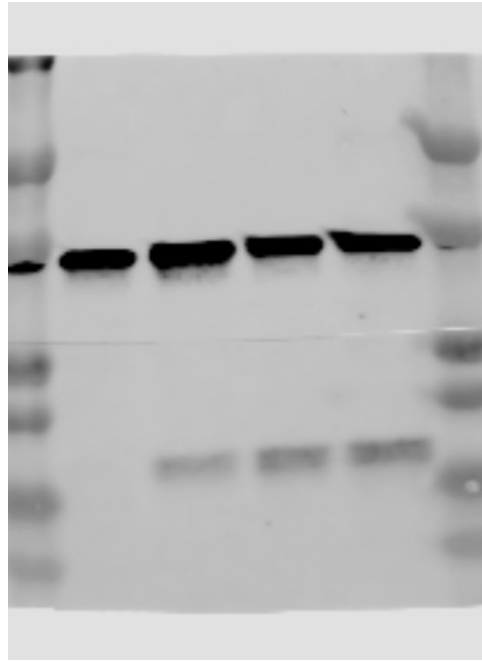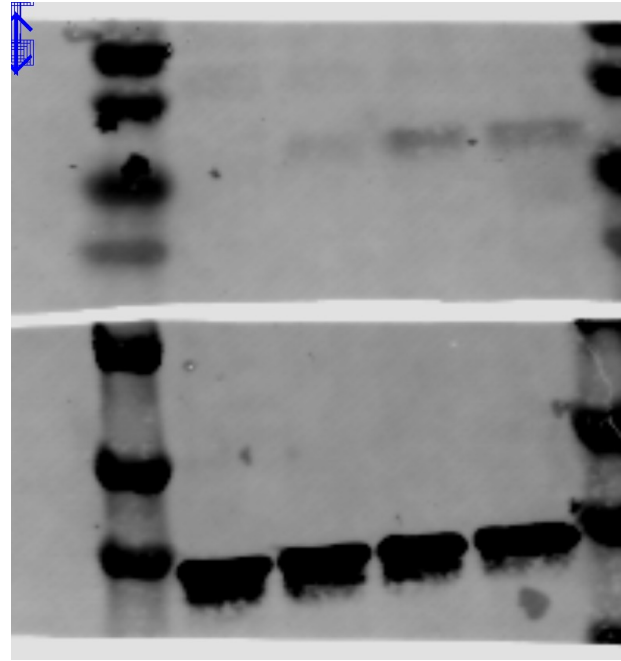

Supp Fig 2I

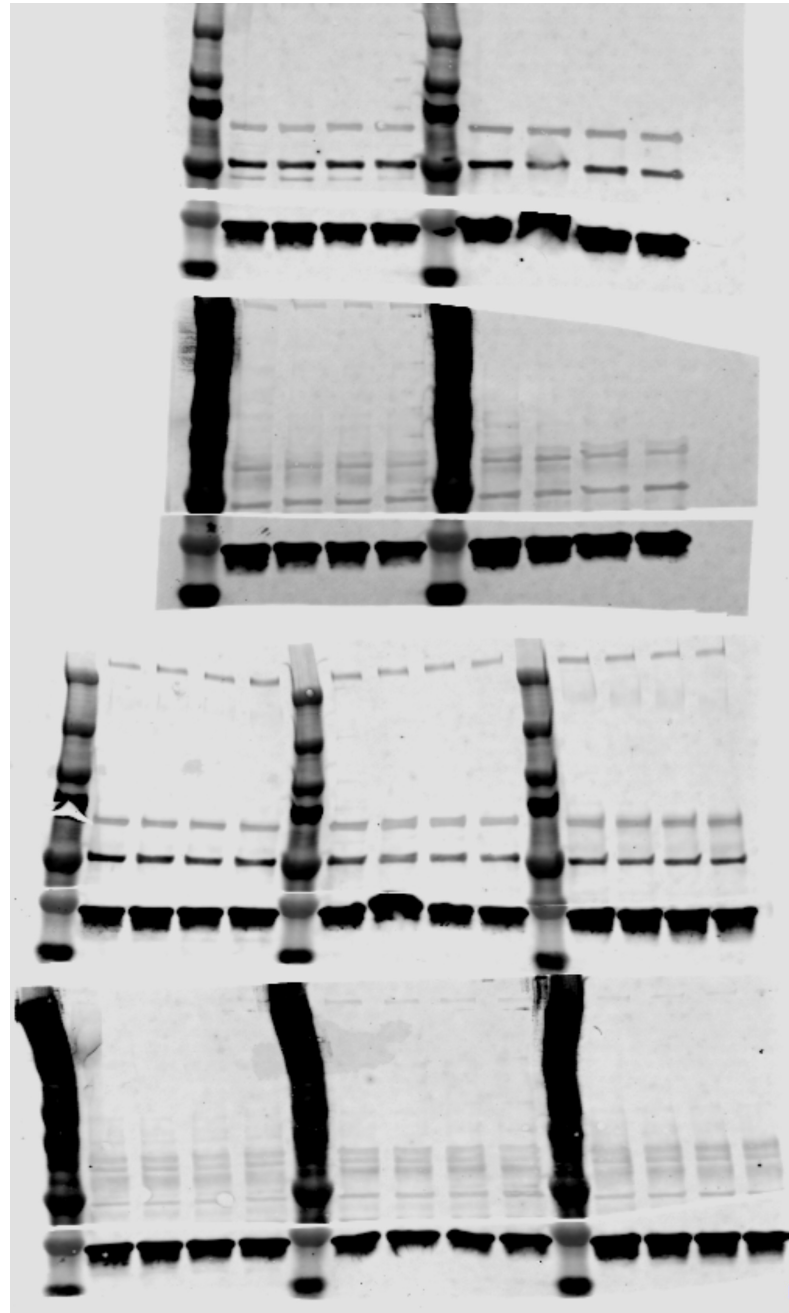

Supp Fig 7E

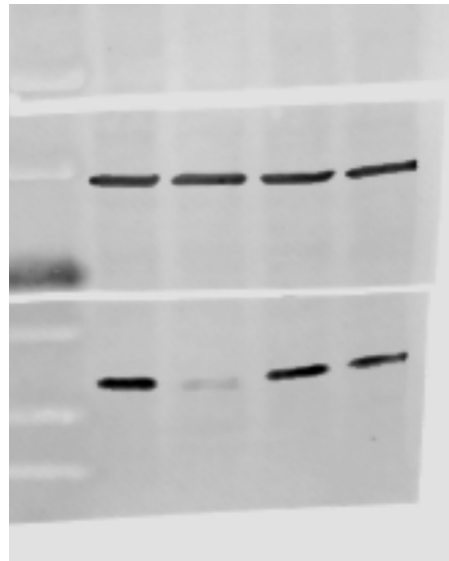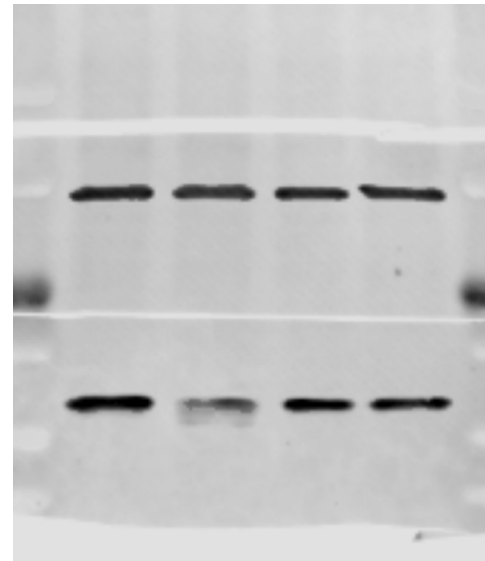

Supp Fig 7F

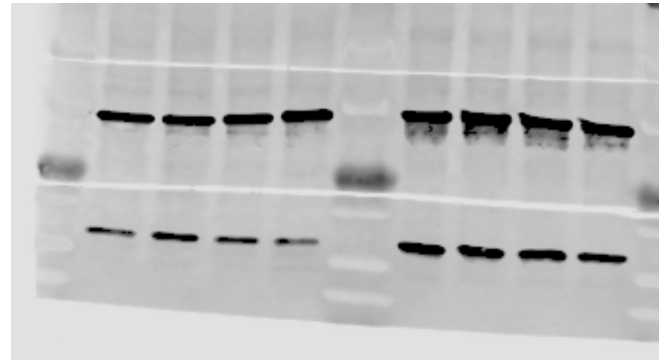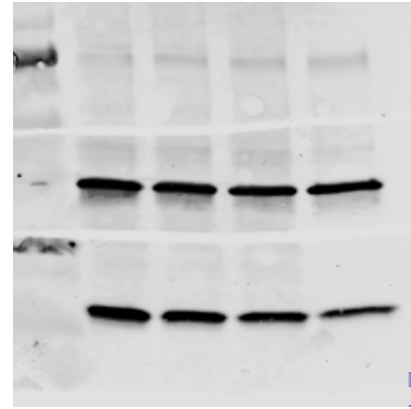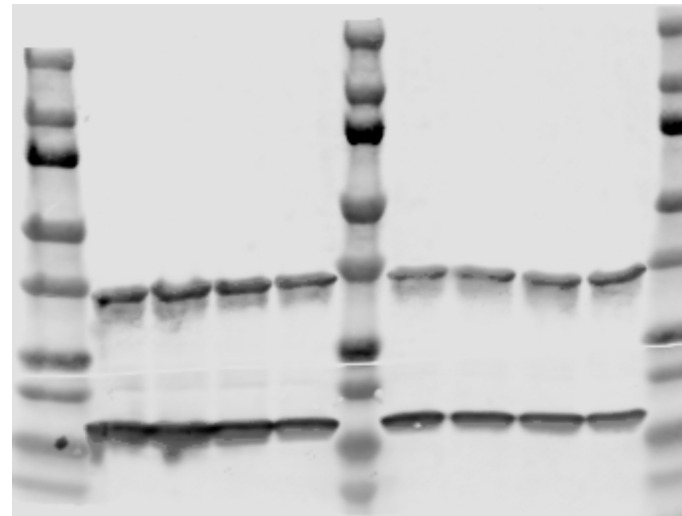



Supp Fig 7G

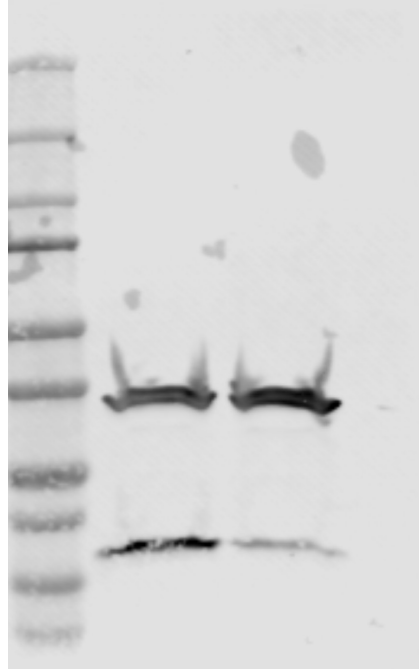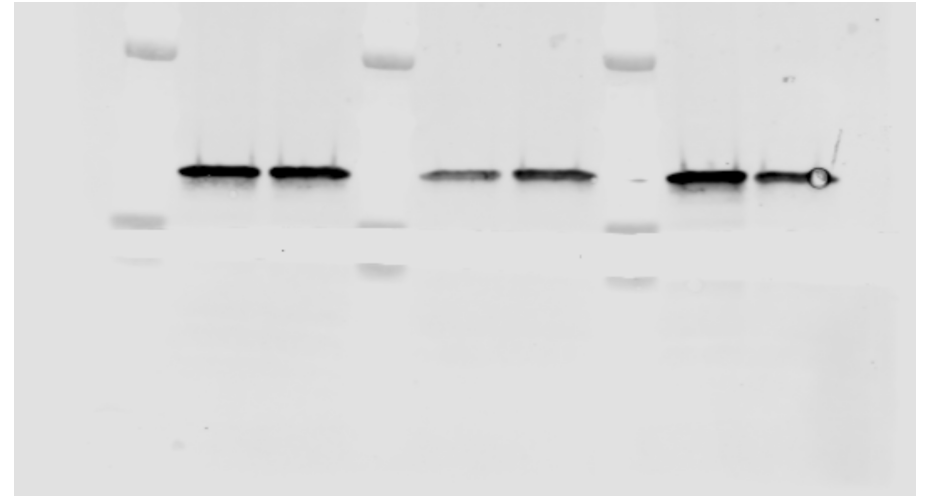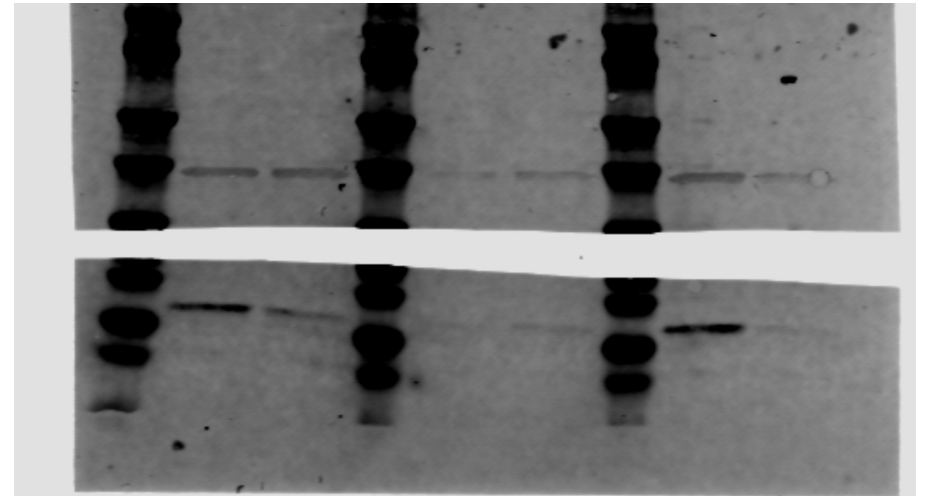

Supp Fig 8A

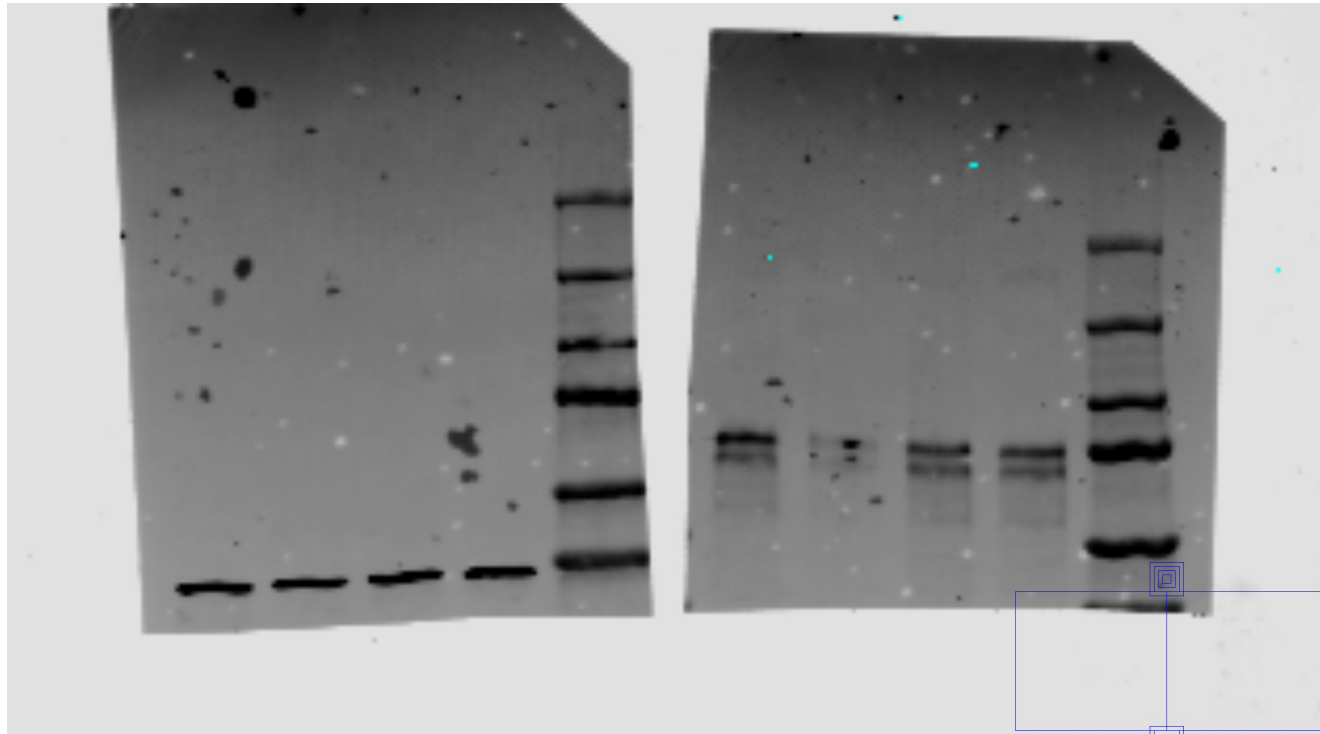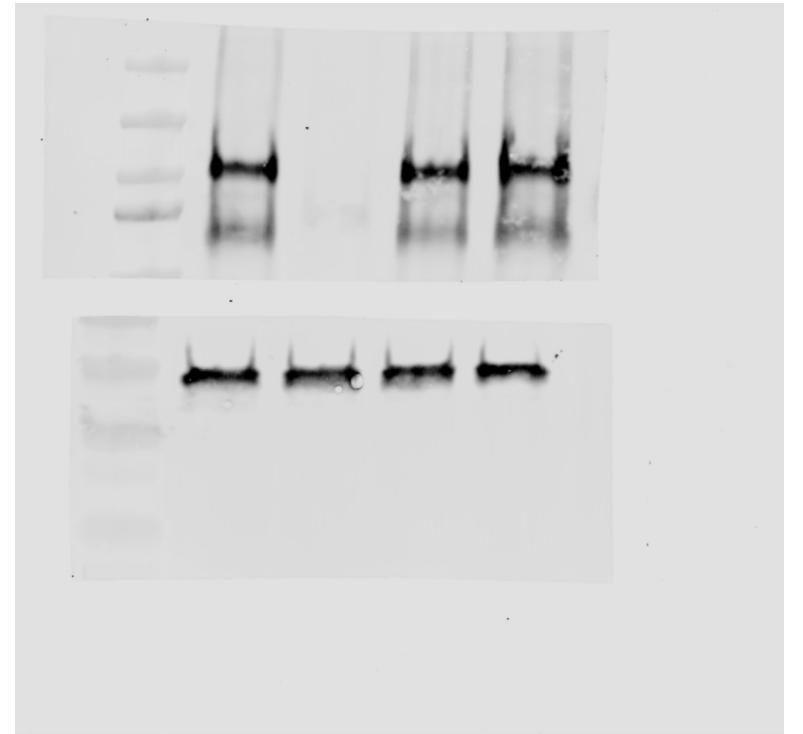

Supp Fig 8B

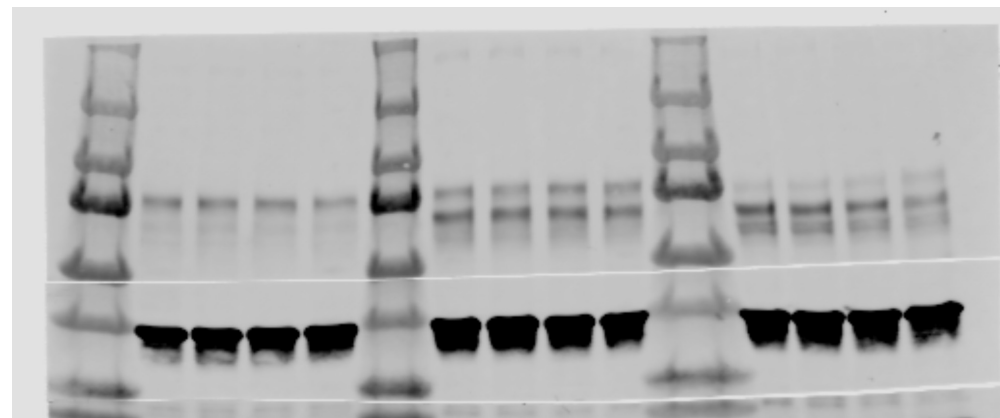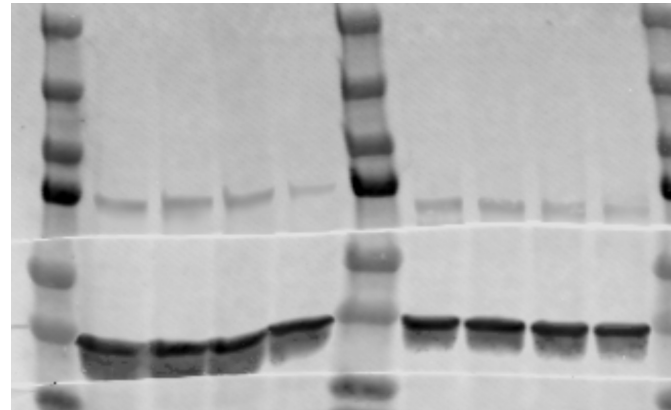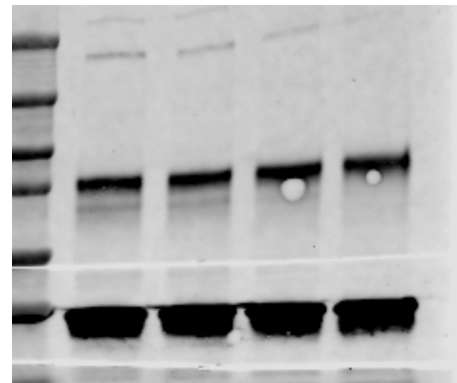

Supp Fig 8E

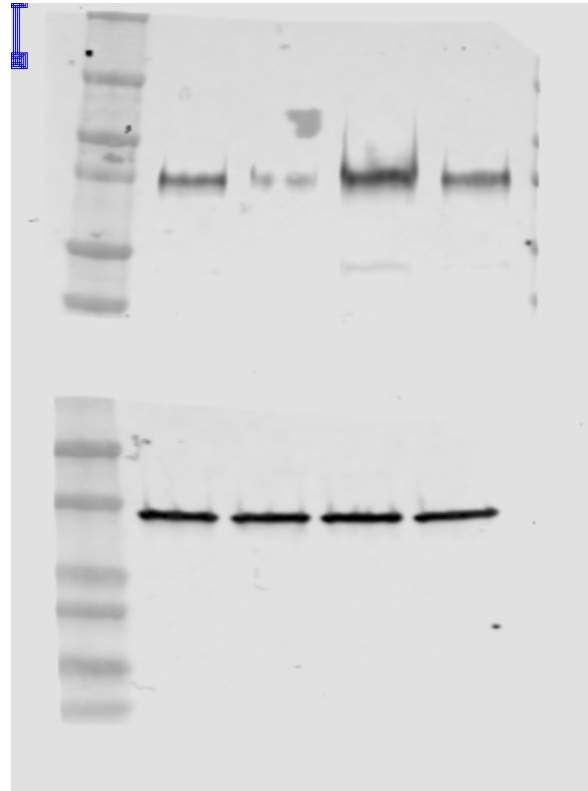

Supp Fig 8F

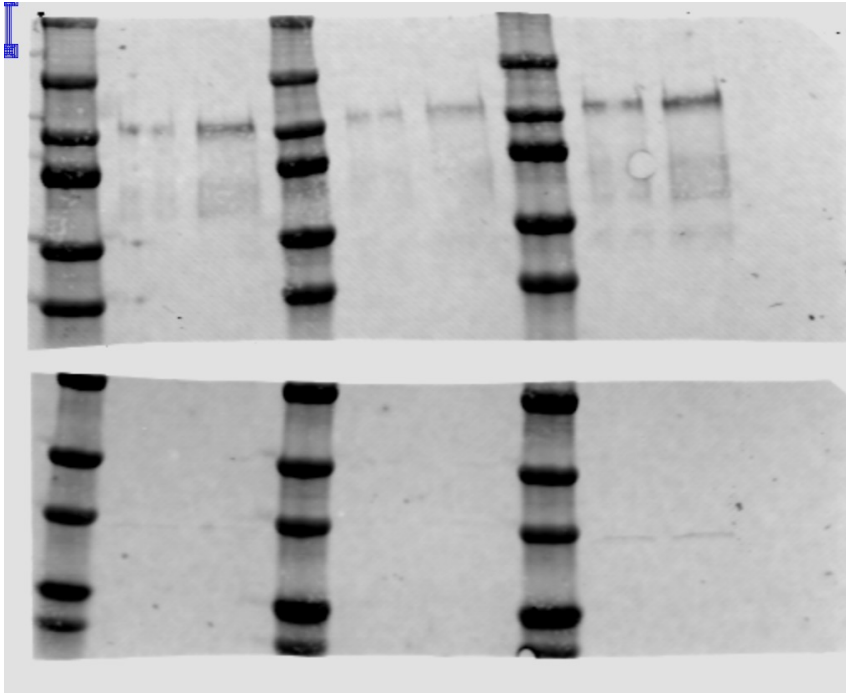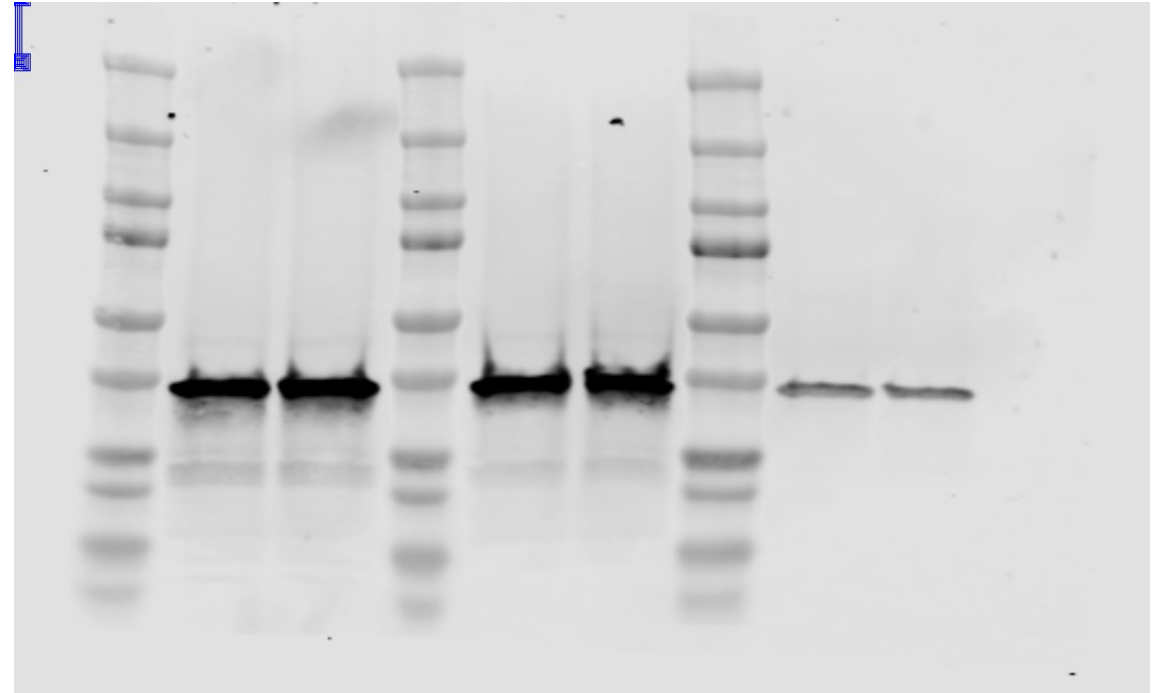

Supplement: NIHMS2043146-supplement-Uncropped_Western_Blots.pdf [file NIHMS2043146-supplement-Uncropped_Western_Blots.pdf]
